1 **Organisation of gene programs revealed by unsupervised analysis of diverse**  
2 **gene-trait associations**

3

4 Dalia Mizikovsky<sup>1</sup>, Marina Naval Sanchez<sup>1</sup>, Christian M. Nefzger<sup>1</sup>, Gabriel Cuellar Partida<sup>2,\*,#</sup>,  
5 Nathan J. Palpant<sup>1,#</sup>

6

7 <sup>1</sup> Institute for Molecular Bioscience, University of Queensland, Brisbane, Australia

8 <sup>2</sup> University of Queensland, Diamantina Institute

9 # Co-corresponding authors

10

11 \*Current address: 23andMe Inc.

12

13

14 **Corresponding authors**

15

16 Nathan Palpant

17 Institute for Molecular Bioscience

18 University of Queensland

19 Brisbane, QLD, Australia

20 E: [n.palpant@uq.edu.au](mailto:n.palpant@uq.edu.au)

21 T: 61 04 39 241 069

22

23 Gabriel Cuellar Partida

24 Diamantina Institute

25 University of Queensland

26 Brisbane, QLD, Australia

27 E: [g.cuellarpartida@uq.edu.au](mailto:g.cuellarpartida@uq.edu.au)

28

29

30

31

32

33

34  
35  
36  
37  
38  
39  
40  
41  
42  
43  
44  
45  
46  
47  
48  
49  
50  
51  
52  
53  
54  
55  
56  
57  
58

## **ABSTRACT**

Genome wide association studies provide statistical measures of gene-trait associations that reveal how genetic variation influences phenotypes. This study develops an unsupervised dimensionality reduction method called UnTANGLeD (Unsupervised Trait Analysis of Networks from Gene Level Data) which organises 16,849 genes into discrete gene programs by measuring the statistical association between genetic variants and 1,393 diverse complex traits. UnTANGLeD reveals 173 gene clusters enriched for protein-protein interactions and highly distinct biological processes governing development, signalling, disease, and homeostasis. We identify diverse gene networks with robust interactions but not associated with known biological processes. Analysis of independent disease traits shows that UnTANGLeD gene clusters are conserved across all complex traits, providing a simple and powerful framework to predict novel gene candidates and programs influencing orthogonal disease phenotypes. Collectively, this study demonstrates that gene programs co-ordinately orchestrating cell functions can be identified without reliance on prior knowledge, providing a method for use in functional annotation, hypothesis generation, machine learning and prediction algorithms, and the interpretation of diverse genomic data.

## 59 INTRODUCTION

60 Generation of consortium-scale data such as ENCODE (1), the Human Cell Atlas (2) and the  
61 UKBiobank (3) coupled with the development of advanced computational methods is enabling  
62 the creation of transformative models that harness the natural diversity of biological systems.  
63 These models draw on the relationships and patterns derived from biological data to establish  
64 quantitative frameworks that can make highly accurate predictions, with implications for nearly  
65 every field of biology. For example, in the field of structural biology, patterns in the sequences  
66 and structures of proteins' evolutionary homologs reveal how amino acids interact, enabling  
67 prediction of protein structure with atomic accuracy (4). Similarly, patterns of repressive  
68 histone methylation (H3K27me3) across hundreds of human cell types enable identification of  
69 genes governing cell decisions and functions for any cell type and organism (5).

70  
71 Genome wide association studies (GWAS) characterise the genomic variation underlying  
72 complex traits and diseases, providing insights into how genes affect biological processes (6).  
73 Despite the wealth of variant-trait association information, GWAS studies predominantly focus  
74 on elucidating the genetic basis of a single trait or a group of highly related traits (6, 7). Here,  
75 we utilize patterns of genomic variation across hundreds of diverse phenotypes as the basis for  
76 an unsupervised method to parse the organisation of gene programs in cells.

77  
78 We hypothesised that complex traits are underpinned by conserved gene programs that can be  
79 identified by studying associations between genetic variation and phenotypic variation. To test  
80 this, we developed UnTANGLEd (Unsupervised Trait Analysis of Networks from Gene Level  
81 Data), which identifies patterns of association between genes and hundreds of diverse  
82 phenotypes. UnTANGLEd creates a phenotypic signature to cluster genes with similar  
83 associations across many traits in an unsupervised manner into gene programs controlling cell  
84 biological processes (**Figure 1**).

85  
86 We used a gene-trait association matrix derived from GWAS data for 1,393 complex traits to  
87 infer co-ordinately acting gene programs that represent both known and novel biological  
88 processes. While the scale of associations available from public GWAS data is underpowered  
89 to saturate the accuracy of our model, we demonstrate that UnTANGLEd can be applied to any  
90 orthogonal GWAS data to predict the genetic basis of disease including in underpowered and  
91 transethnic GWAS data. UnTANGLEd provides a powerful analytical framework for studies  
92 in population genetics, cell biology, and genomics, that will improve as more data emerges.

93 Collectively, this study provides a statistical framework for defining genes orchestrating  
94 biological processes by evaluating genetic signatures across diverse complex traits.

95

## 96 **MATERIALS AND METHODS**

### 97 ***Data Collection***

98 S-MultiXcan results for 1,393 phenotypes with statistically significant SNP-based heritability  
99 ( $p < 0.05$ ) were downloaded from CTG-VL (<http://vl.genoma.io>). Phenotypes are listed in  
100 **Table S2**. SNP-based heritability was estimated using linkage disequilibrium score regression  
101 (LDSR). The significance values reflecting the strength of the association between each gene  
102 and trait across all tissues were compiled into a gene-trait association matrix.

103

### 104 ***Dimensionality Reduction Analysis Pipeline***

105 All genes with fewer than 2 significant associations across all phenotypes ( $p < 10^{-4}$ ) were  
106 removed, leaving 16849 genes. Following this, all values in the gene-trait association matrix  
107 were chi-squared transformed. Infinite values produced when transforming very small p-value  
108 ( $< 1e-300$ ) due to floating point precision were replaced with 1,415, which was 5 greater than  
109 the largest non-infinite value. The data was then normalised by the sum of chi-squared values  
110 per phenotype and scaled by a factor of 10,000. 10 principal components were retained from  
111 the principal component analysis (PCA). Clustering of genes was performed using the native  
112 *Seurat* shared-nearest neighbour algorithm. Clustering iterations were performed at increasing  
113 resolutions from 0.2 to 20 in increments of 0.2. The resolution is a parameter from *Seurat* where  
114 increased values lead to a greater number of clusters. Cluster assignments were compiled into  
115 a consensus distance matrix, where each gene pair had a value representing how often they  
116 were grouped together out of 100 potential matches. 100 was then subtracted from the values  
117 and they were made absolute to transform the matrix into a dissimilarity matrix. Agglomerative  
118 clustering using Ward's minimum variance method, as implemented in the *stats* package, was  
119 applied to the consensus matrix directly. The average silhouette score (a metric used to  
120 calculate how well a data point relates to its cluster) across all genes was calculated using the  
121 *cluster* package from 2 to 300 clusters. The *inflection* package was used to calculate the plateau  
122 point, which was determined to be the optimal number of clusters. Pearson's correlation was  
123 used to determine the correlation of a gene with the other genes in the same cluster based on  
124 chi-squared association values.

125

## 126 ***Enrichment Analyses***

127 GO, DO, KEGG enrichment, colocalization and tissue specificity enrichment were performed  
128 using *ClusterProfiler* (8). An FDR corrected significance value of  $p < 0.01$  was used.  
129 Colocalization was determined using *ClusterProfiler* enrichment for the Molecular Signatures  
130 Database collection 3: positional gene sets (9). The largest proportion of genes within a cluster  
131 belonging to a single genomic region was divided by the total number of genes within the  
132 cluster to identify the maximum degree of colocalization. STRING enrichment analysis was  
133 performed using the *STRINGdb* package, with a significance threshold of  $p < 0.001$  and a  
134 confidence threshold of 0.400. STRING enrichment analysis without the text-mining  
135 component was performed using the online STRING interface (<https://string-db.org/>) for  
136 clusters found to have PPI enrichment in the prior analysis with a confidence threshold of 0.150  
137 to preserve predicted interactions reinforced by other components. For the calculation of the  
138 correlation between the loss of enrichment and the degree of colocalization, clusters 111 and  
139 173 were removed due to having well established biological functions despite being highly  
140 colocalised. Broad enrichment analysis for more specialised gene sets was performed using  
141 *EnrichR* (<https://maayanlab.cloud/Enrichr/>) across all 192 libraries. Redundant libraries,  
142 including GO, KEGG, chromosomal location and NIH-grant associated libraries were  
143 excluded. The top significant term from each library for each cluster are reported in **Table S9**.  
144 A significance value threshold of 0.01, after correction for multiple testing, was used. For  
145 identification of genes possessing the same protein domains or belonging to the same family,  
146 the EnrichR library 'Pfam\_Domains\_2019' was used. A distinct protein family or domain was  
147 defined by collating the family or domain terms together that shared genes until there was no  
148 overlap between them. Protein terms did not need to be significantly enriched, but two or more  
149 members of a protein family had to be present in a single cluster.

150

## 151 ***Permutations***

152 Five permutations were generated by re-ordering the values within the gene-trait association  
153 matrix. These permutations were analysed as described above. A one-way ANOVA with FDR  
154 corrected pairwise comparisons was performed to identify significant differences in the number  
155 of enriched clusters, total enriched GO terms and the most significant GO enrichment of any  
156 cluster.

157

## 158 ***Phenotype Associations***

159 The gene-trait association matrix containing p-values was  $-\log_{10}$  transformed. All infinite  
160 values generated due to floating point precision were windsorized with 315, which was 5  
161 greater than the maximum finite value. The phenotypic associations for the genes within a  
162 cluster were extracted, averaged, normalised for their average associations across the dataset  
163 and ranked.

164

## 165 ***Clustering quality in dimensionality reduction methods***

166 We extracted the UMAP coordinates for all genes as calculated by *Seurat*. Following this, we  
167 identified the 10 closest neighbours for each gene and calculated the average correlation of chi-  
168 squared association values between the gene and its neighbours. The UMAP was re-plotted  
169 representing the average correlation with each point colour. We repeated the process, instead  
170 colouring by the number of significant associations for each gene.

171

## 172 ***Prediction of novel genes using an underpowered GWAS of the same trait***

### 173 *Data collection and S-MultiXcan Analysis*

174 We selected 13 phenotypes for which GWAS studies had been performed at differing cohort  
175 sizes or ethnicities for the same, or comparable traits. The specific studies and their respective  
176 details can be found in **Table S1**. Summary statistics were downloaded from various sources  
177 and harmonised using MetaXcan's in-built harmonization  
178 (<https://github.com/hakyimlab/MetaXcan>) to be compatible with the MASHR models. We then  
179 performed S-MultiXcan analysis of each trait using the MASHR models built off the V8 GTEx  
180 release. Associated genes were defined as those found to have a significance of  $p < 10^{-4}$   
181 by S-MultiXcan.

182

### 183 *Global Clustering Coefficient Calculation*

184 The genes identified for an independent GWAS were projected onto the 173 identified clusters.  
185 Following this, we generated an unweighted adjacency matrix in which genes in the same  
186 cluster were represented by a 1, and genes in different clusters by a 0. A comparison between  
187 the same gene was represented by 0. Finally, the global clustering coefficient (GCC) for the  
188 genes was calculated. To derive a statistical significance, we randomly sampled the same  
189 number of genes as there were significant genes for the phenotype and calculated the GCC one-  
190 hundred times. A Z score was calculated from the curve generated by the sampled values.

191

## 192 *Gene Prediction*

193 We took a simple approach of predicting which clusters were associated with the trait using the  
194 S-MultiXcan associations from the smaller GWAS and then checking whether novel gene  
195 associations identified by the larger GWAS were in those clusters. A chi-squared enrichment  
196 test was used where the minimum expected frequency was greater than 5, and a fisher's test if  
197 not. Several approaches to predict clusters associated with the trait were trialled. The first was  
198 to identify any of the 173 clusters with a significant gene in it. The second was to integrate the  
199 additional phenotype into the trait-gene association matrix. Next, clusters were identified which  
200 had an overall significance signature  $> 1.5$  times the average or were significantly ( $p < 0.05$ )  
201 higher than the average signature. Different values were tested for these thresholds, with these  
202 providing the best performance. The third approach was to predict associated clusters from the  
203 previously established 173 clusters using the thresholds taken in approach two. A one-way  
204 ANOVA was performed with pairwise comparisons to determine the best approach. Approach  
205 three was the most effective, albeit not significantly, while maintaining a low computational  
206 burden. In instances where transethnic GWAS were compared, the East-Asian GWAS was  
207 used to predict the trait relevant clusters, and the European GWAS was used as the test set.

208

## 209 *Gene Prioritization Analysis*

210 The GWAS with the largest sample size for each of the 13 traits listed in **Table S1** was used to  
211 determine the potential of our pipeline for prioritizing genes within a locus. Clumping was  
212 performed on each summary statistic using PLINK (<https://www.cog-genomics.org/plink/>) and  
213 1000 genomes phase 1 genotype data with an LD threshold of 0.5. This was followed by  
214 clumping for long distance LD, at the same threshold. Next, we identified individual 500kb  
215 regions around the lead SNPs and the genes within that region.

216

217 We took a leave one chromosome out (LOCO) approach, where we removed all potential genes  
218 on one chromosome. With the remaining genes, we identified which clusters were enriched for  
219 genes associated with the trait. To calculate enrichment, we treated all genes associated with  
220 one locus as one positive, so that enrichment was for different loci and not genes at the same  
221 locus. A fisher's enrichment test was used to determine significance. Finally, we assessed at  
222 what proportion of loci the UnTANGLEd clusters identified a gene when that chromosome  
223 was left out of the analysis.

224

## 225 ***Normalisation***

226 We trialled relative count, centralised-log ratio and logarithmic normalisation on the chi-  
227 squared transformed values of the gene-trait matrix across phenotypes. We evaluated their  
228 effects on the following metrics: correlation score, silhouette score, GO and STRING  
229 enrichment, global clustering coefficient, prediction of GWAS. A Kruskal Wallis one-way  
230 analysis of variance was used to evaluate differences. Relative count was used for the final  
231 pipeline.

232

## 233 ***Phenotype Filtering Based on Euclidean Distance***

234 A distance matrix between phenotypes using chi-squared transformed, RC-normalised data was  
235 generated using the Euclidean distance formula from the package *wordspace*. Phenotypes with  
236 a Euclidean distance below a set threshold, which indicated a high degree of relatedness, were  
237 removed from the data, leaving the phenotype with the highest number of significant  
238 associations. This was performed for thresholds 0 to 62, at which too few phenotypes remained  
239 to cluster the genes using the dimensionality reduction methods. GO enrichment was used to  
240 evaluate the clustering efficacy at each threshold.

241

## 242 ***Phenotype Subsampling and Sensitivity Analyses***

243 Phenotype subsampling was performed on two datasets; MultiXcan results for 1393 phenotypes  
244 across 16,849 genes generated in this paper, and another dataset containing MultiXcan results  
245 for 4091 phenotypes across 15,734 genes (phenomexcan.org). For the data containing 1393  
246 phenotypes, subsampling was performed randomly without replacement from 50 to 1393  
247 phenotypes in 20 equal increments across 5 replicates for each number of traits. The full  
248 UnTANGLeD clustering pipeline was applied to each subsampled matrix. Adjusted rand index  
249 (ARI) was calculated for each of the subsampled clustering configurations compared to the full  
250 dataset. This analysis was repeated for the data containing 4091 phenotypes; however,  
251 subsampling was performed from 50 phenotypes to 4091 phenotypes in 50 equal increments.

252

## 253 ***Cluster Conservation***

254 To explore the cause for the marked increase in ARI between 1322 phenotypes and 1393  
255 phenotypes, cluster conservation was calculated between them. For each cluster from 1393  
256 phenotypes, the proportion of genes that remained grouped together in each of the clusters from



257 1322 phenotypes was calculated. That proportion was used to assign a conservation score to  
258 each gene, depending on how large the proportion of cluster the specific gene remained with  
259 was. The same approach was applied between 4091 phenotypes and 4009 phenotypes.

260

## 261 **RESULTS**

262

### 263 **Unsupervised identification of gene groups with shared complex trait associations**

264 We used MultiXcan results from CTG-VL (10) derived from publicly available GWAS  
265 (primarily from UK Biobank, on ~400,000 individuals) to create a gene-trait association matrix  
266 for 16,849 genes and 1,393 traits (**Figure 1, Figure S1, Table S2**). For each gene trait pair,  
267 MultiXcan predicts whether trait-associated variants alter the gene's expression. The chi-  
268 squared transformed significance value for each gene-trait association pair was compiled into  
269 the gene-trait association matrix (**Figure 2A**). These values were normalised using relative  
270 count normalisation to account for the difference in power between phenotypes. Performance  
271 was not significantly different using other normalisation methods including centralised log ratio  
272 or log normalised data (**Figure S2**). The data was then clustered using *Seurat*, a dimensionality  
273 reduction method commonly used to analyse single cell RNA sequencing data to cluster cells  
274 into related groups (11). Here, we use *Seurat* to test whether the calculated gene-trait  
275 associations could be simplified into biologically enriched gene clusters. Clustering was  
276 performed across 100 stepwise increases in resolution, a parameter which increases the number  
277 of gene clusters. Repeat iterations provided an opportunity to survey both the broad scope of  
278 biological processes that could be identified, as well as the specificity that could be achieved  
279 with each biological process (**Figure 2B**).

280

281 To test the biological validity of the derived clusters, we used positive gene sets as defined by  
282 gene ontology (GO) (12) and STRING (13) to show that gene clusters have significant  
283 enrichment for GO biological processes and STRING protein-protein interactions (**Figure 2C**  
284 **and 2D**). To demonstrate that the observed enrichment is driven by distinct gene-trait  
285 association signatures rather than chance, we performed permutation analyses in which the  
286 values in the data matrix were randomly re-ordered. Permutations had significantly fewer  
287 enriched clusters, GO terms and a lower strongest significance compared to the real data ( $p <$   
288  $4 \times 10^{-27}$ ) (**Figure 2C, Figure S3A-B**). Furthermore, we validated that GO enriched clusters  
289 were more likely to also have enrichment for protein-protein interactions, suggesting the  
290 enrichment is robust (**Figure 2D**). This analysis revealed that genes possessing similar

291 associations to complex trait phenotypes cluster meaningfully into biologically enriched groups  
292 and the enrichment is not stochastic.

293

294 We next developed an ensemble learning method we call “consensus clustering” that  
295 incorporates a measure of clustering robustness and quality. Across each of 100 stepwise  
296 increases in clustering resolution we evaluated the robustness of clustering by assessing how  
297 often every possible gene combination was clustered together ranging from 100 (always) to 0  
298 (never) and compiled these values into a consensus matrix (**Figure 2E**). Following this, we  
299 performed agglomerative hierarchical clustering, evaluating the average silhouette score at  
300 each possible number of clusters. The silhouette score quantifies how consistent genes within  
301 the same cluster are across *Seurat* resolutions. To derive the optimal number of gene clusters,  
302 we calculated the plateau point of the average silhouette score, which informs the number of  
303 clusters at which point further splitting no longer improves the stability of clustering  
304 assignments (**Figure S3C**). Applying this methodology to gene-trait associations for 16,849  
305 genes, we identified 173 clusters with an average of 97 genes (**Figure 2F, G**). Across each  
306 cluster, we measured the silhouette score, a metric of cluster robustness and the correlation  
307 score, a metric of relation across phenotypes, thereby providing two metrics to quantify the  
308 quality of clustering (**Figure 2H**). Collectively, we call this approach UnTANGLEd:  
309 Unsupervised Trait Analysis of Networks from Gene Level Data.

310

### 311 **Consensus clustering identifies robust gene groups enriched for known gene sets**

312 We analysed each cluster by reference to curated annotations of gene programs (GO, disease  
313 ontology (14)), signalling pathways (KEGG (15)), protein-protein interactions (STRING), and  
314 tissue specificity (16) to evaluate the ability of UnTANGLEd to identify distinct, biologically  
315 established gene programs in an unsupervised manner (**Figure 3A, Figure S3D, Tables S3-8**).  
316 This analysis revealed significant enrichment of cell biological pathways and networks across  
317 gene clusters, with stronger enrichment among clusters with higher silhouette and correlation  
318 scores (**Figure 3A**). We further performed enrichment analysis of the UnTANGLEd clusters  
319 using the EnrichR database (17) (**Figure S4A-C, Table S9**), finding considerable enrichment  
320 for disease-associated genes, gene-expression perturbations associated with disease states or  
321 drugs and protein domains and families. We note that although many clusters contain multiple  
322 members of a protein family (18) the proportion of any one protein family in the cluster is  
323 minor (**Figure S4D, Table S10**).

324

325 We next investigated the relationship between individual gene clusters and the traits most  
326 strongly influencing the genes within the clusters, using enriched GO processes as a proxy for  
327 the functional profile of a cluster (**Figure 3B**). Each cluster is defined by a distinct gene-trait  
328 association ‘signature’ indicated by the variation and strength of association across 1,393  
329 diverse complex traits. In some instances, the enriched biological processes for certain gene  
330 clusters are clearly related to the cluster’s most significantly associated complex trait  
331 phenotypes (e.g., cluster 119: GO enrichment: Cholesterol Homeostasis; Dominant complex  
332 trait phenotypes: Low-density lipoprotein, Alipoprotein B quantile).

333  
334 Since UnTANGLEd draws on associations across diverse phenotypes to inform gene-gene  
335 relationships, the method can identify gene groups with enriched functions that are apparently  
336 biologically independent of the phenotypes most significantly associated with the genes in the  
337 cluster. For example, cluster 80, enriched for embryonic morphogenesis (GO:004859), is most  
338 significantly associated to the phenotype Bone Mineral Density and cluster 111, enriched for  
339 nucleosome organisation (GO:0034728), is most significantly associated to the phenotype  
340 Mean Corpuscular Haemoglobin. These results support the central hypothesis that genes with  
341 shared effects across diverse phenotypes can be clustered into gene groups controlling shared  
342 biological functions and processes in an unsupervised manner (**Figure 3B**).

343  
344 Importantly, we show that the GO enriched gene clusters show no overlap in their strongest  
345 enriched biological functions, and almost no overlap in their top 5 enriched terms,  
346 demonstrating the use of gene-trait association data to parse novel biological gene programs  
347 encoded within the genome (**Figure 3C**).

348  
349 Stratifying clusters by their silhouette and correlation scores reveals a higher level of GO,  
350 STRING, KEGG, DO and tissue specificity enrichment with higher clustering quality,  
351 indicating that the metrics provide an accurate representation of cluster quality (**Figure 3A, D**).  
352 Furthermore, both the robustness of clustering and the presence and strength of GO and  
353 STRING enrichment are correlated with the number of significant associations to phenotypes  
354 per gene (Pearson’s correlation,  $r > 0.65$ ), as well as the stability of clustering (Pearson’s  
355 correlation,  $r > 0.69$ ) (**Figure 3E-G, Figure S5A-F**).

356  
357 Lastly, we note that there is considerable colocalization of genes within clusters, with a stronger  
358 relationship between the correlation score and the degree of colocalization for the genes in a

359 cluster (Pearson's correlation,  $r = 0.77$ ), than the cluster robustness (Pearson's correlation,  $r =$   
360  $0.34$ ) (**Figure 3H, Table S11**). STRING enrichment may also be inflated due to the text-  
361 mining component, as findings from GWAS may be incorporated into the database, with genes  
362 in proximity often being reported together. Indeed, we find that the loss of enrichment due to  
363 removal of the text-mining component is correlated with the colocalization of the cluster ( $r =$   
364  $0.60$ ) (**Figure S6A-B**). However, clusters with a high degree of colocalization are not  
365 necessarily artefacts of false-positive associations identified by MultiXcan. For example,  
366 clusters 173 and 111 are strongly enriched for immune processes and chromatin organisation  
367 respectively, despite being highly colocalised (**Figure S6C-D**).

368

### 369 **Subsampling reveals need for more data to improve accuracy of UnTANGLeD**

370 We next sought to determine how the number and diversity of phenotypes influences the  
371 accuracy and utility of UnTANGLeD clusters. We show that the number of GO enriched  
372 clusters is highly correlated with the number of phenotypes utilised in the analysis (Pearson's  
373 correlation,  $r = 0.85$ ), even when phenotypic diversity is preserved (**Figure S7A**). To further  
374 test this, we performed phenotype subsampling and evaluated clustering accuracy using an  
375 adjusted rand index (ARI) analysis. We found that clustering accuracy compared to the full  
376 data improved with the addition of more phenotypes, however a marked increase in ARI  
377 between 1322 and the full data set suggests that inaccuracy in clustering that isn't determined  
378 by phenotypic diversity can be attributed to genes which have weak signatures and few  
379 significant associations (**Figure S7B**). We repeated subsampling in a larger dataset containing  
380 MultiXcan analysis of 4091 phenotypes retrieved from Pividori *et al.* (2020) which resulted in  
381 the same outcome (**Figure S7C**). Comparison of the two data sets revealed that genes already  
382 having many significant associations simply had more associations in the larger dataset with  
383 both datasets possessing an equal proportion of genes with few to no significant associations  
384 (**Figure S7D**). Further, that genes with higher numbers of significant associations have higher  
385 degrees of conservation (**Figure S7E-F**). It's likely that the effective number of traits is similar  
386 between the two datasets, as both mostly draw on the UK Biobank and have many highly  
387 correlated phenotypes

388

389 Cumulatively, these findings indicate that the quality of gene clustering is dependent on the  
390 scale and quality of data needed to derive high silhouette and correlation scores as a basis for  
391 efficient enrichment of functional gene clusters. Accordingly, as more data becomes available,  
392 the quality and accuracy of UnTANGLeD will improve. However, simply increasing the

393 number of phenotypes leads to an increase in redundant associations, and therefore strategies  
394 to increase the number of significant gene-trait associations across the genome should be  
395 employed, such as diversifying phenotypes and increasing cohort size.

396

### 397 **UnTANGLeD clusters are conserved across traits and can predict novel trait associated** 398 **genes**

399 GWAS require collections of large cohorts comprising thousands of individual-level genotype  
400 data to characterise the genetic architecture of a trait. Furthermore, collecting enough samples  
401 can prove challenging for many diseases, and as such they are often underrepresented in  
402 biobanks.

403

404 We hypothesised that UnTANGLeD gene clusters would be conserved across complex traits.  
405 To test this, we investigated an independent GWAS of ulcerative colitis (UC) (19) (**Figure 4A**).  
406 We show that the 278 genes associated with UC ( $p < 10^{-4}$ ) (**Figure 4B**) were significantly more  
407 clustered within the UnTANGLeD clusters than expected by chance ( $p = 2 \times 10^{-9}$ ) (**Figure 4C**).  
408 The result shows that despite not being used to construct the clusters, UC associated genes  
409 nevertheless group within the UnTANGLeD clusters, demonstrating that the defined gene  
410 programs are conserved. We replicate our findings in 6 additional independent GWAS  
411 phenotypes, highlighting that the UnTANGLeD clusters are conserved across a broad  
412 phenotypic space (3, 20–28) (**Figure 4G**).

413

414 We next tested whether the gene clusters can be used to predict novel genes and cellular  
415 processes underpinning independent complex trait data. To test this hypothesis, we examined  
416 two GWAS for UC. The first was performed in 2013 with 6,687 cases and 19,718 controls (29),  
417 and the latter in 2017 with 12,366 cases and 33,609 controls (19) (**Figure 4A**). MultiXcan  
418 analysis of the summary statistics identified 153 and 278 genes respectively, with an overlap  
419 of 53 genes (**Figure 4B**). We projected the MultiXcan associations for the 2013 GWAS onto  
420 the 173 clusters, identifying clusters were statistically associated with UC (**Figure S8**). Finally,  
421 we tested whether the clusters predicted from the 2013 GWAS contained novel genes identified  
422 by the 2017 GWAS. Of the 225 novel genes identified by the 2017 GWAS, our approach was  
423 able to use the 2013 GWAS to predict 120 with a significant enrichment for predicting UC  
424 associated genes compared to other genes ( $p < 3 \times 10^{-121}$ , chi-squared test) (**Figure 4D**).

425

426 GWAS of the same complex trait conducted in populations of differing ancestries may  
427 implicate both shared and distinct loci. We tested whether UnTANGLeD clusters are conserved  
428 for genes specific to non-European ancestries, given that the UnTANGLeD gene clusters are  
429 built from a European cohort. To test this, we examined a GWAS for triglyceride levels in an  
430 East Asian population, which identified 34 genes (30) (**Figure S9A-B**). Mirroring our findings  
431 in a GWAS conducted on a European population, we found that the genes associated with  
432 triglyceride levels in an East Asian population are significantly more clustered than expected  
433 ( $p = 1 \times 10^{-9}$ ) and replicate this finding in 4 other GWAS conducted in populations of non-  
434 European ancestry (30–32). We further tested whether the GWAS conducted in the East Asian  
435 cohort could be used to predict novel genes identified in a European cohort. We found that  
436 clusters implicated in triglyceride levels using the East Asian GWAS were highly enriched for  
437 genes identified by the European GWAS ( $p = 6 \times 10^{-109}$ ) (**Figure 4F**).

438  
439 All together, we show significant enrichment for prediction of novel genes across GWAS  
440 performed for 7 traits in differing cohort sizes in a European population, and 4 traits for which  
441 GWAS were performed in different ancestries (3, 20-28, 30–33) (**Figure 4G, Figure S9C**).

442  
443 We further tested whether the UnTANGLeD clusters could be used to prioritize causal genes  
444 at any given locus. It is difficult to accurately identify the causal genes from GWAS identified  
445 variants due to linkage disequilibrium and complex regulatory effects of intergenic variants.  
446 For each independent trait, we identified potential gene candidates within 500kb of each  
447 independent significant SNP then took a leave one chromosome out approach (LOCO) to  
448 investigate whether genes on the removed chromosome would be implicated in the clusters  
449 associated with the remaining genes. (**Figure 4H**). We are able to identify a major proportion  
450 of loci independently across all traits and reduce the potential candidates at each locus  
451 considerably, further highlighting the utility of UnTANGLeD (**Figure 4I**).

452

## 453 **DISCUSSION**

454 This study demonstrates that gene programs governing biological processes can be identified  
455 without reliance on prior knowledge, by analysing the association between genetic variation  
456 and a large range of diverse complex traits. Several prior studies have constructed small gene  
457 networks using a limited number of disease phenotypes and their associated genes from curated  
458 GWAS databases and restricted sources of rare genetic variants. Other studies, like PheWAS  
459 (34, 35) and PhenomeXcan (36) have collated genomic associations across numerous  
460 phenotypes to create resources of variant-trait and gene-trait associations.

461  
462 Here, we construct a gene-trait association matrix for 16,849 genes across 1,393 complex traits  
463 similarly to PhenomeXcan, and further the concept by using UnTANGLeD to identify gene  
464 programs. We apply dimensionality reduction methods, which can harness the high  
465 dimensional, complex gene-trait association data, allowing us to greatly expand on the scale of  
466 studies previously attempting to build gene networks. By increasing the scale of data, we not  
467 only identify gene programs enriched for biological processes specific to associated phenotypes  
468 but also reveal gene programs enriched for central processes governing diverse mechanisms of  
469 cellular development and homeostasis.

470  
471 The UnTANGLeD framework is a powerful approach to identify gene programs orchestrating  
472 key biological processes. We implicate novel genes in clusters enriched for known processes  
473 and identify numerous novel gene programs with enrichment for protein-protein interactions  
474 and no known function. We further highlight the utility of UnTANGLeD for hypothesis  
475 generation and functional annotation of genes, which may be particularly valuable for non-  
476 coding genes, as they are notoriously difficult to annotate *in silico* (37). Finally, the  
477 UnTANGLeD framework reveals relationships between complex traits, linking phenotypes by  
478 the gene programs that underpin them.

479  
480 We demonstrate the utility of UnTANGLeD for predicting genes associated with complex traits  
481 and diseases using a low-powered GWAS of the same trait. Currently, standard methods use  
482 gene-set analysis to improve power to identify genes and pathways involved in a phenotype,  
483 such as MAGMA, or GIGSEA (38–41). Our method eliminates the need to define gene-sets  
484 and instead uses gene-trait association data to learn gene sets governing complex traits (39),  
485 enabling us to implicate novel trait associated genes and loci from a much smaller cohort size.

486

487 We further highlight the use of the UnTANGLeD clusters for gene prioritization, showing that  
488 they effectively select gene candidates at different loci related to the same phenotype. Current  
489 gene prioritisation approaches use either distance-based metrics or mapping to eQTLs to predict  
490 changes in gene expression (42). However, these also suffer from a considerable false positive  
491 rate and may not always distinguish between two genes in proximity, as noted in our data (42).  
492 Some recent methods have integrated biological data, such as gene sets, RNA sequencing and  
493 protein-protein interaction databases to further prioritise genes at a locus (43). Our framework  
494 can be used independently or integrated with any of these approaches to advance understanding  
495 of complex trait biology.

496  
497 Outside of its utility in GWAS analyses, UnTANGLeD may provide key mechanisms for data  
498 analysis in medical and industry pipelines including genetic testing and drug discovery. For  
499 example, polygenic risk scores (PRS) are an emerging method that evaluate an individual's  
500 disease risk from genetic variants (44). Methods such as UnTANGLeD may help reveal genes  
501 and hence genetic variants governing cell programs underlying disease risk and hence improve  
502 prediction accuracy. In the context of pharmacogenomics, studies have shown that drug targets  
503 with genetic support from either rare or common diseases are more than twice as likely to pass  
504 through clinical trials (45, 46). Since UnTANGLeD captures gene programs associated with all  
505 complex traits and diseases, its predictive power may help de-risk candidates and thereby  
506 decrease cost associated with the drug discovery pipeline. Overall, UnTANGLeD represents a  
507 powerful and versatile framework for studying cellular gene programs to interpret diverse  
508 sources of orthogonal genetic data.

509  
510 We note several limitations in our method. Primarily, that the current GWAS data does not  
511 represent the whole phenome. Furthermore, many traits are highly correlated, and disease traits  
512 are underrepresented in the UK Biobank, the main source of data in this study. Secondly,  
513 UnTANGLeD relies on S-MultiXcan to construct the gene-trait association matrix. While S-  
514 MultiXcan is powered to detect associations across all tissues, it suffers from a high false  
515 discovery rate and may perform poorly in tissues with small sample sizes. Moreover, S-  
516 MultiXcan can identify genes colocalised with a causal gene as significant, which can obscure  
517 biological signatures. Other approaches such as SMR MR-JTI may remedy this issue (47).  
518 Additionally, UnTANGLeD does not account for the predicted directionality of effect or tissue-  
519 specific effects, which may help to further increase the quality and biological specificity of the  
520 clusters. Biological validation of the method using established gene sets may be inflated due to



521 GWAS data being included in the definition of the gene sets. Finally, we note that although  
522 UnTANGLEd is a powerful tool for identifying clusters in an unsupervised manner, the overall  
523 function of the cluster may be difficult to determine. The development of improved gene-based  
524 tests and emergence of larger GWAS data spanning the whole phenome will improve the  
525 accuracy and utility of UnTANGLEd.

526

527 This study provides a powerful framework for the identification of gene programs governing  
528 biological processes conserved across all complex traits and diseases, with important  
529 applications for functional annotation, hypothesis generation, machine learning and prediction  
530 algorithms and interpretation of GWAS and diverse other genomic data types. Our approach  
531 can be applied to any collection of gene-trait information, harnessing the power of biological  
532 patterns in a diverse landscape of phenotypic variation.

533

534

535

536

537

538

539

540 **DATA AND MATERIALS AVAILABILITY**

541 All source code available on GitHub (<https://github.com/palpant-comp/UnTANGLEd>) and all  
542 data available on Zenodo (<https://doi.org/10.5281/zenodo.6572617>).

543 **SUPPLEMENTARY MATERIALS**

544 Supplementary Data are available at NAR online.

545

546 **FUNDING**

547 We thank support from the National Health and Medical Research Council of Australia (Grant  
548 1143163, N.P.) and the Australian Research Council (Grant SR1101002, N.P.) and the National  
549 Heart Foundation of Australia (Grant 101889, N.P.).

550

551 **ACKNOWLEDGEMENTS**

552 We thank Naomi Wray and Jian Yang for assistance in conceptual development of the study.

553

554 **AUTHOR CONTRIBUTIONS**

555

556 **DM:** Developed the study, performed all analyses, and wrote the manuscript

557 **MS** and **CN:** Helped supervise bioinformatics analysis

558 **GCP:** Helped supervise and design GWAS data selection and analysis, interpreted data, and  
559 wrote the manuscript

560 **NP:** Conceived and supervised the project, raised funding, and wrote the manuscript

561

562 **CONFLICT OF INTEREST STATEMENT**

563 GCP is currently an employee of 23andMe Inc. and holds stock options for the company.

564

565

566

567 **REFERENCE**

- 568 1. ENCODE Project Consortium (2012) An integrated encyclopedia of DNA elements in the  
569 human genome. *Nature*, **489**, 57–74.
- 570 2. Rozenblatt-Rosen,O., Stubbington,M.J.T., Regev,A. and Teichmann,S.A. (2017) The  
571 Human Cell Atlas: from vision to reality. *Nat. 2017 5507677*, **550**, 451–453.
- 572 3. Sudlow,C., Gallacher,J., Allen,N., Beral,V., Burton,P., Danesh,J., Downey,P., Elliott,P.,  
573 Green,J., Landray,M., *et al.* (2015) UK Biobank: An Open Access Resource for  
574 Identifying the Causes of a Wide Range of Complex Diseases of Middle and Old Age.  
575 *PLoS Med.*, **12**, 1–10.
- 576 4. Jumper,J., Evans,R., Pritzel,A., Green,T., Figurnov,M., Ronneberger,O.,  
577 Tunyasuvunakool,K., Bates,R., Židek,A., Potapenko,A., *et al.* (2021) Highly accurate  
578 protein structure prediction with AlphaFold. *Nature*, **596**, 583–589.
- 579 5. Shim,W.J., Sinniah,E., Xu,J., Vitrinel,B., Alexanian,M., Andreoletti,G., Shen,S., Sun,Y.,  
580 Balderson,B., Boix,C., *et al.* (2020) Conserved Epigenetic Regulatory Logic Infers Genes  
581 Governing Cell Identity. *Cell Syst*, **11**, 625-639.e13.
- 582 6. Visscher,P.M., Wray,N.R., Zhang,Q., Sklar,P., McCarthy,M.I., Brown,M.A. and Yang,J.  
583 (2017) 10 Years of GWAS Discovery: Biology, Function, and Translation. *Am. J. Hum.*  
584 *Genet.*, **101**, 5–22.
- 585 7. Bellomo,T.R., Bone,W.P., Chen,B.Y., Gawronski,K.A.B., Zhang,D., Park,J., Levin,M.,  
586 Tsao,N., Klarin,D., Lynch,J., *et al.* (2021) Multi-trait GWAS of atherosclerosis detects  
587 novel pleiotropic loci. *medRxiv*, 10.1101/2021.05.21.21257493.
- 588 8. Yu,G., Wang,L.-G., Han,Y., He,Q.-Y. (2012) clusterProfiler: an R Package for Comparing  
589 Biological Themes Among Gene Clusters. *Omi. A J. Integr. Biol.*, **16**, 284–287.
- 590 9. Liberzon,A., Subramanian,A., Pinchback,R., Thorvaldsdóttir,H., Tamayo,P. and  
591 Mesirov,J.P. (2011) Molecular signatures database (MSigDB) 3.0. *Bioinformatics*, **27**,  
592 1739.
- 593 10. Cuellar-Partida,G., Lundberg,M., Kho,P.F., D’Urso,S., Gutierrez-Mondragon,L.F. and  
594 Hwang,L.-D. (2019) Complex-Traits Genetics Virtual Lab: A community-driven web  
595 platform for post-GWAS analyses. *bioRxiv*, 10.1101/518027.
- 596 11. Butler,A., Hoffman,P., Smibert,P., Papalexi,E. and Satija,R. (2018) Integrating single-cell  
597 transcriptomic data across different conditions, technologies, and species. *Nat.*  
598 *Biotechnol.*, **36**, 411–420.

- 599 12. Ashburner,M., Ball,C.A., Blake,J.A., Botstein,D., Butler,H., Cherry,J.M., Davis,A.P.,  
600 Dolinski,K., Dwight,S.S., Eppig,J.T., *et al.* (2000) Gene ontology: tool for the unification  
601 of biology. The Gene Ontology Consortium. *Nat. Genet.*, **25**, 25–29.
- 602 13. Szklarczyk,D., Gable,A.L., Lyon,D., Junge,A., Wyder,S., Huerta-Cepas,J., Simonovic,M.,  
603 Doncheva,N.T., Morris,J.H., Bork,P., *et al.* (2019) STRING v11: protein–protein  
604 association networks with increased coverage, supporting functional discovery in genome-  
605 wide experimental datasets. *Nucleic Acids Res.*, **47**, D607–D613.
- 606 14. Schrimi,L.M., Arze,C., Nadendla,S., Wayne Chang,Y.-W., Mazaitis,M., Felix,V., Feng,G.  
607 and Kibbe,W.A. (2012) Disease Ontology: a backbone for disease semantic integration.  
608 *Nucleic Acids Res.*, **40**.
- 609 15. Kanehisa,M. (2000) KEGG: Kyoto Encyclopedia of Genes and Genomes. *Nucleic Acids*  
610 *Res.*, **28**, 27–30.
- 611 16. Jain,A. and Tuteja,G. (2019) TissueEnrich: Tissue-specific gene enrichment analysis.  
612 *Bioinformatics*, **35**, 1966–1967.
- 613 17. Kuleshov,M. V, Jones,M.R., Rouillard,A.D., Fernandez,N.F., Duan,Q., Wang,Z.,  
614 Koplev,S., Jenkins,S.L., Jagodnik,K.M., Lachmann,A., *et al.* (2016) Enrichr: a  
615 comprehensive gene set enrichment analysis web server 2016 update. *Nucleic Acids Res.*,  
616 **44**, W90–W97.
- 617 18. El-Gebali,S., Mistry,J., Bateman,A., Eddy,S.R., Luciani,A., Potter,S.C., Qureshi,M.,  
618 Richardson,L.J., Salazar,G.A., Smart,A., *et al.* (2019) The Pfam protein families database  
619 in 2019. *Nucleic Acids Res.*, **47**, D427–D432.
- 620 19. de Lange,K.M., Moutsianas,L., Lee,J.C., Lamb,C.A., Luo,Y., Kennedy,N.A., Jostins,L.,  
621 Rice,D.L., Gutierrez-Achury,J., Ji,S.G., *et al.* (2017) Genome-wide association study  
622 implicates immune activation of multiple integrin genes in inflammatory bowel disease.  
623 *Nat Genet*, **49**, 256–261.
- 624 20. Köttgen,A., Albrecht,E., Teumer,A., Vitart,V., Krumsiek,J., Hundertmark,C., Pistis,G.,  
625 Ruggiero,D., O’Seaghdha,C.M., Haller,T., *et al.* (2013) Genome-wide association analyses  
626 identify 18 new loci associated with serum urate concentrations. *Nat Genet*, **45**, 145–154.
- 627 21. Tin,A., Marten,J., Halperin Kuhns,V.L., Li,Y., Wuttke,M., Kirsten,H., Sieber,K.B., Qiu,C.,  
628 Gorski,M., Yu,Z., *et al.* (2019) Target genes, variants, tissues and transcriptional pathways  
629 influencing human serum urate levels. *Nat. Genet.*, **51**, 1459–1474.
- 630 22. Shah,S., Henry,A., Roselli,C., Lin,H., Sveinbjörnsson,G., Fatemifar,G., Hedman,Å.K.,  
631 Wilk,J.B., Morley,M.P., Chaffin,M.D., *et al.* (2020) Genome-wide association and  
632 Mendelian randomisation analysis provide insights into the pathogenesis of heart failure.

- 633 *Nat. Commun.*, **11**, 163.
- 634 23. Kathiresan,S., Melander,O., Guiducci,C., Surti,A., Burt,N.P., Rieder,M.J., Cooper,G.M.,  
635 Roos,C., Voight,B.F., Havulinna,A.S., *et al.* (2008) Six new loci associated with blood low-  
636 density lipoprotein cholesterol, high-density lipoprotein cholesterol or triglycerides in  
637 humans. *Nat Genet*, **40**, 189–197.
- 638 24. Willer,C.J., Schmidt,E.M., Sengupta,S., Peloso,G.M., Gustafsson,S., Kanoni,S., Ganna,A.,  
639 Chen,J., Buchkovich,M.L., Mora,S., *et al.* (2013) Discovery and refinement of loci  
640 associated with lipid levels. *Nat. Genet.*, **45**, 1274–1283.
- 641 25. Stahl,E.A., Raychaudhuri,S., Remmers,E.F., Xie,G., Eyre,S., Thomson,B.P., Li,Y.,  
642 Kurreeman,F.A., Zhernakova,A., Hinks,A., *et al.* (2010) Genome-wide association study  
643 meta-analysis identifies seven new rheumatoid arthritis risk loci. *Nat Genet*, **42**, 508– 514.
- 644 26. Okada,Y., Wu,D., Trynka,G., Raj,T., Terao,C., Ikari,K., Kochi,Y., Ohmura,K., Suzuki,A.,  
645 Yoshida,S., *et al.* (2014) Genetics of rheumatoid arthritis contributes to biology and drug  
646 discovery. *Nature*, **506**, 376–381.
- 647 27. Schizophrenia Psychiatric Genome-Wide Association Study (GWAS)Consortium (2011)  
648 Genome-wide association study identifies five new schizophrenia loci. *Nat Genet*, **43**, 969–  
649 976.
- 650 28. Schizophrenia Working Group of the Psychiatric Genomics Consortium (2014) Biological  
651 insights from 108 schizophrenia-associated genetic loci. *Nature*, **511**, 421– 427.
- 652 29. Anderson,C.A., Boucher,G., Lees,C.W., Franke,A., D’Amato,M., Taylor,K.D., Lee,J.C.,  
653 Goyette,P., Imielinski,M., Latiano,A., *et al.* (2011) Meta-analysis identifies 29 additional  
654 ulcerative colitis risk loci, increasing the number of confirmed associations to  
655 47. *Nat Genet*, **43**, 246–252.
- 656 30. Spracklen,C.N., Chen,P., Kim,Y.J., Wang,X., Cai,H., Li,S., Long,J., Wu,Y., Wang,Y.X.,  
657 Takeuchi,F., *et al.* (2017) Association analyses of East Asian individuals and transancestry  
658 analyses with European individuals reveal new loci associated with cholesterol and  
659 triglyceride levels. *Hum Mol Genet*, **26**, 1770–1784.
- 660 31. Lam,M., Chen,C.-Y., Li,Z., Martin,A.R., Bryois,J., Ma,X., Gaspar,H., Ikeda,M.,  
661 Benyamin,B., Brown,B.C., *et al.* (2019) Comparative genetic architectures of  
662 schizophrenia in East Asian and European populations. *Nat. Genet.*, **51**, 1670–1678.
- 663 32. Wang,Y.-F., Zhang,Y., Lin,Z., Zhang,H., Wang,T.-Y., Cao,Y., Morris,D.L., Sheng,Y.,  
664 Yin,X., Zhong,S.-L., *et al.* (2021) Identification of 38 novel loci for systemic lupus  
665 erythematosus and genetic heterogeneity between ancestral groups. *Nat. Commun.*, **12**, 772.

- 666 33. Bentham,J., Morris,D.L., Graham,D.S.C., Pinder,C.L., Tomblason,P., Behrens,T.W.,  
667 Martín,J., Fairfax,B.P., Knight,J.C., Chen,L., *et al.* (2015) Genetic association analyses  
668 implicate aberrant regulation of innate and adaptive immunity genes in the pathogenesis of  
669 systemic lupus erythematosus. *Nat Genet*, **47**, 1457–1464.
- 670 34. Diogo,D., Tian,C., Franklin,C.S., Alanne-Kinnunen,M., March,M., Spencer,C.C.A.,  
671 Vangjeli,C., Weale,M.E., Mattsson,H., Kilpeläinen,E., *et al.* (2018) Phenome-wide  
672 association studies across large population cohorts support drug target validation. *Nat.*  
673 *Commun.* 2018 *91*, **9**, 1–13.
- 674 35. Pendergrass,S.A., Buyske,S., Jeff,J.M., Frase,A., Dudek,S., Bradford,Y., Ambite,J.-L.,  
675 Avery,C.L., Buzkova,P., Deelman,E., *et al.* (2019) A phenome-wide association study  
676 (PheWAS) in the Population Architecture using Genomics and Epidemiology (PAGE)  
677 study reveals potential pleiotropy in African Americans. *PLoS One*, **14**, e0226771.
- 678 36. Pividori,M., Rajagopal,P.S., Barbeira,A., Liang,Y., Melia,O., Bastarache,L., Park,Y.,  
679 Consortium,G., Wen,X. and Im,H.K. (2020) PhenomeXcan: Mapping the genome to the  
680 phenome through the transcriptome. *Sci. Adv.*, **6**, eaba2083.
- 681 37. Perron,U., Provero,P. and Molineris,I. (2017) In silico prediction of lncRNA function using  
682 tissue specific and evolutionary conserved expression. *BMC Bioinformatics*, **18**, 29–39.
- 683 38. Zhu,S., Qian,T., Hoshida,Y., Shen,Y., Yu,J. and Hao,K. (2019) GIGSEA: genotype  
684 imputed gene set enrichment analysis using GWAS summary level data. *Bioinformatics*,  
685 **35**, 160–163.
- 686 39. Zhu,X. and Stephens,M. (2018) Large-scale genome-wide enrichment analyses identify  
687 new trait-associated genes and pathways across 31 human phenotypes. *Nat. Commun.*  
688 (2018) *91*, **9**, 1–14.
- 689 40. de Leeuw,C.A., Mooij,J.M., Heskes,T. and Posthuma,D. (2015) MAGMA: Generalized  
690 Gene-Set Analysis of GWAS Data. *PLOS Comput. Biol.*, **11**, e1004219.
- 691 41. Sun,R., Hui,S., Bader,G.D., Lin,X. and Kraft,P. (2019) Powerful gene set analysis in  
692 GWAS with the Generalized Berk-Jones statistic. *PLoS Genet.*, **15**.
- 693 42. Broekema,R. V., Bakker,O.B. and Jonkers,I.H. (2020) A practical view of fine-mapping  
694 and gene prioritization in the post-genome-wide association era. *Open Biol.*, **10**.
- 695 43. Schaid,D.J., Chen,W. and Larson,N.B. (2018) From genome-wide associations to  
696 candidate causal variants by statistical fine-mapping. *Nat. Rev. Genet.*, **19**, 491.
- 697 44. Lewis,C.M. and Vassos,E. (2020) Polygenic risk scores: From research tools to clinical  
698 instruments. *Genome Med.*, **12**, 1–11.

- 699 45. Nelson,M.R., Tipney,H., Painter,J.L., Shen,J., Nicoletti,P., Shen,Y., Floratos,A.,  
700 Sham,P.C., Li,M.J., Wang,J., *et al.* (2015) The support of human genetic evidence for  
701 approved drug indications. *Nat. Genet.* 2015 478, **47**, 856–860.
- 702 46. King,E.A., Wade Davis,J. and Degner,J.F. (2019) Are drug targets with genetic support  
703 twice as likely to be approved? Revised estimates of the impact of genetic support for drug  
704 mechanisms on the probability of drug approval. *PLOS Genet.*, **15**, e1008489.
- 705 47. Zhou,D., Jiang,Y., Zhong,X., Cox,N.J., Liu,C. and Gamazon,E.R. (2020) A unified  
706 framework for joint-tissue transcriptome-wide association and Mendelian randomization  
707 analysis. *Nat. Genet.*, **52**, 1239–1246.
- 708

709 **FIGURES**

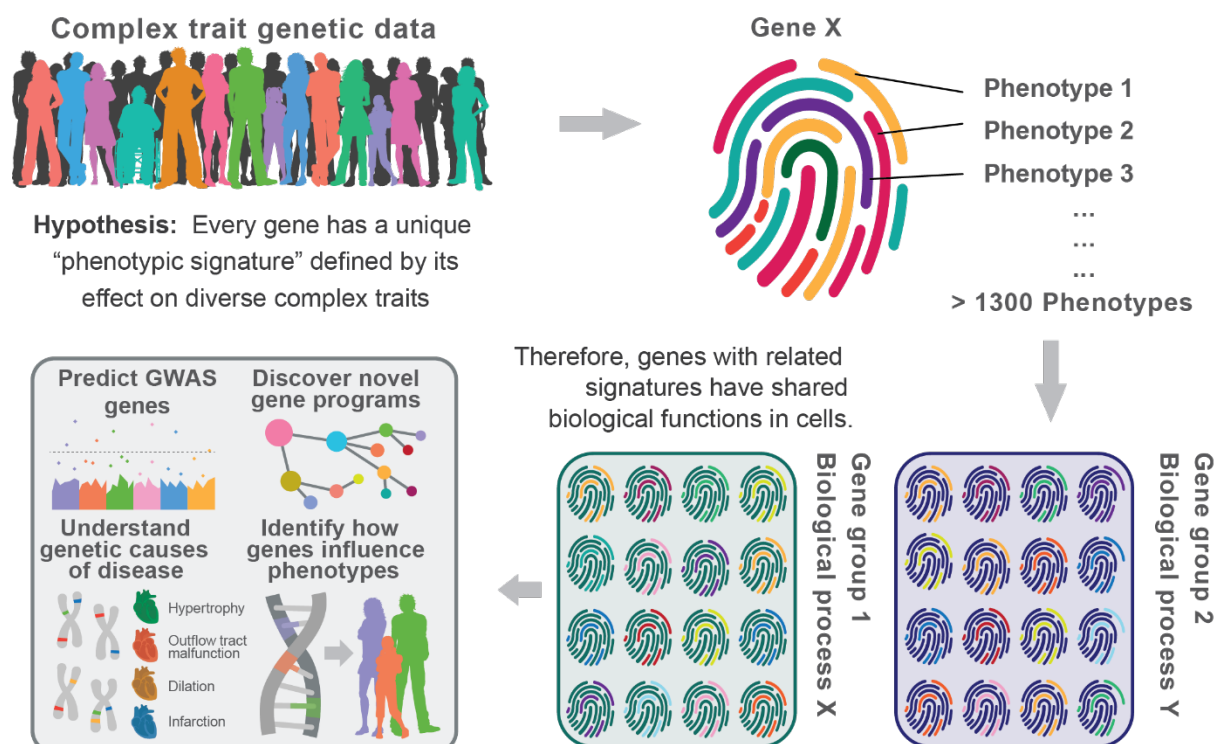

710

711 **Figure 1. Schematic of central model design.** Complex trait genetic data provide a unique

712 association signature for each gene which can be used to parse the genome into functionally

713 related gene sets.

714

715

716

717



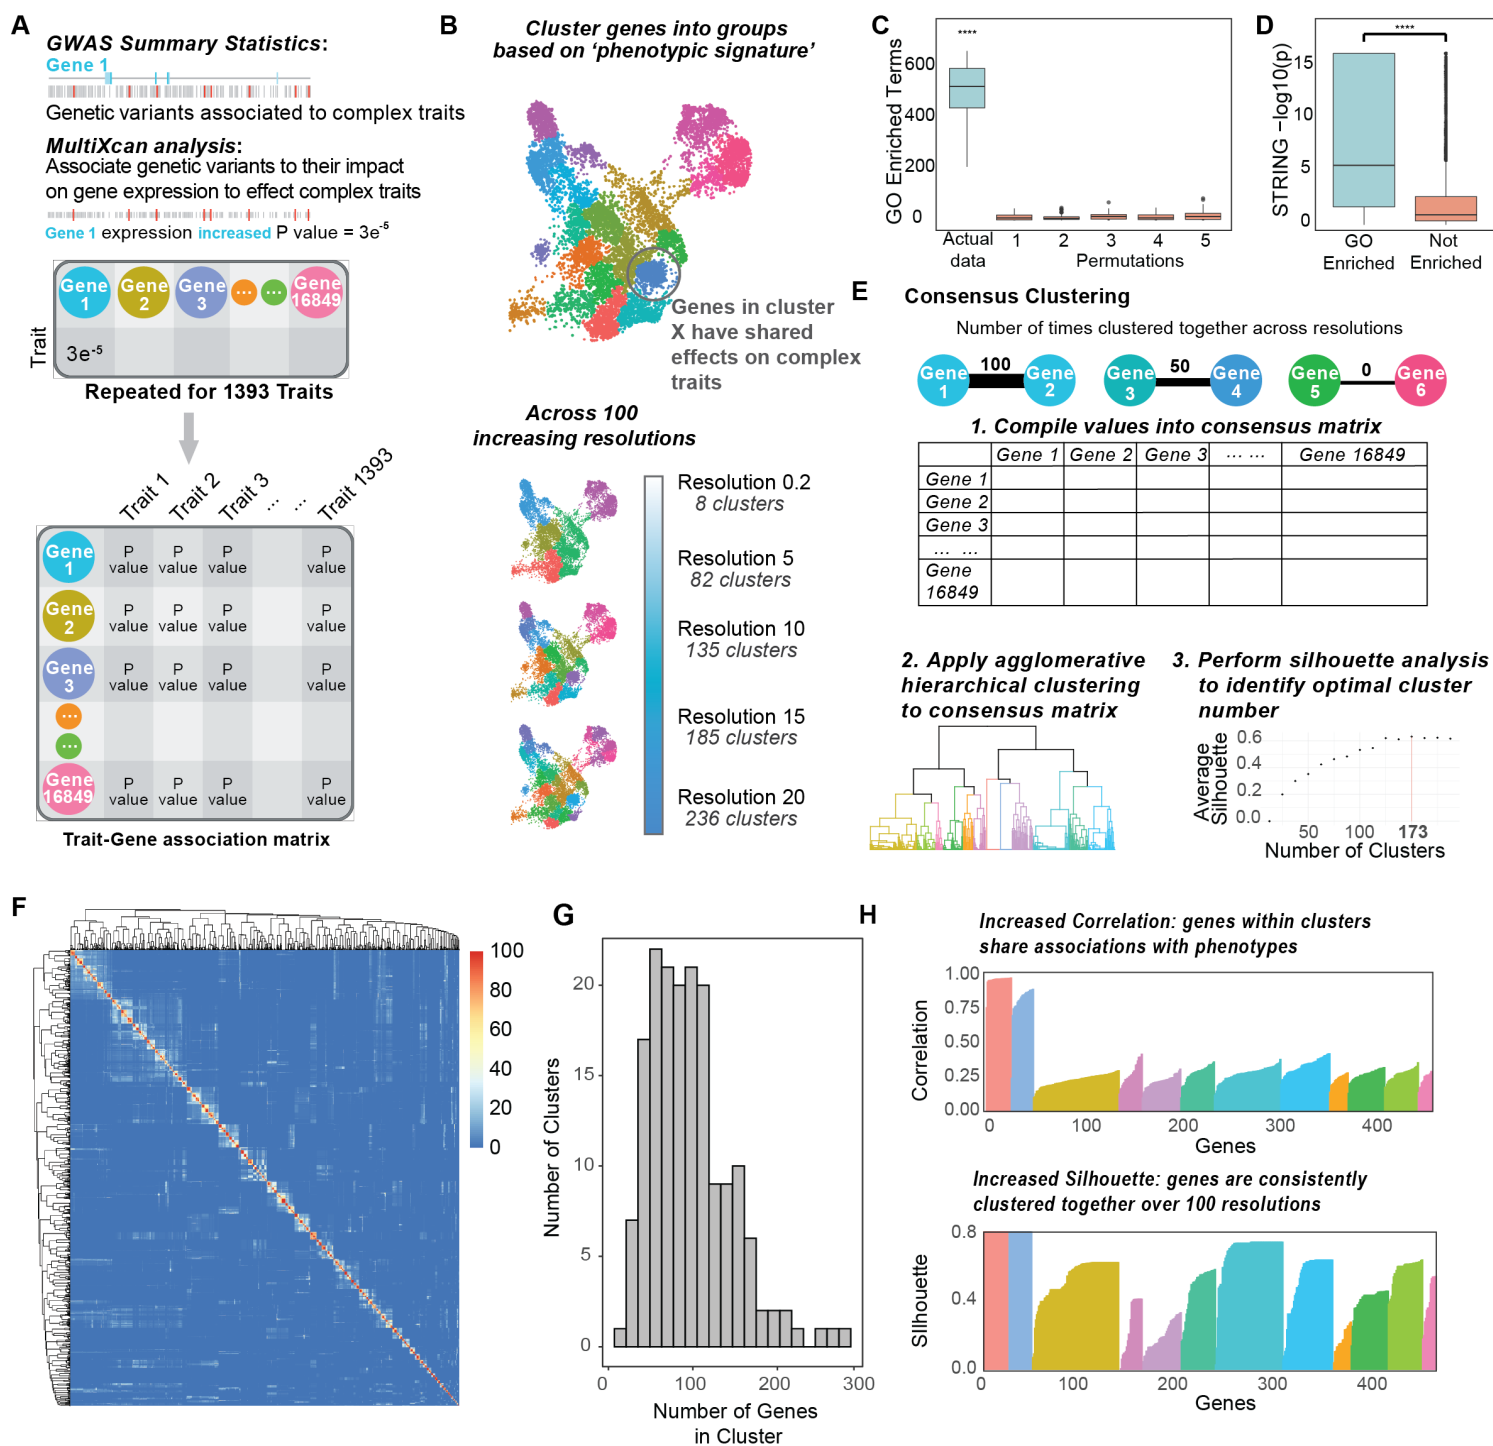

718

719 **Figure 2. Consensus clustering method identifies biologically enriched gene clusters.**

720 (A) MultiXcan analysis links genetic variants to genes by predicting changes in gene  
721 expression using eQTLs. The chi-squared values of the associations between each of 1393 traits  
722 and 25851 genes were compiled into a gene-trait matrix.

723 (B) Dimensionality reduction clustering of genes based on their phenotypic associations was  
724 performed using *Seurat* across resolutions 0.2 to 20 in 0.2 increments.

- 725 (C) Five permutations of the dataset were compared to the real data by the number of enriched  
726 gene ontology terms per resolution. Enrichment was performed using *ClusterProfiler*, FDR  
727 corrected p-value < 0.01. Pairwise comparisons between permutations were performed  
728 with Wilcoxon signed rank test.
- 729 (D) Validation of gene ontology enriched clusters with STRING protein-protein interaction  
730 enrichment. Wilcoxon signed rank test was used to compare STRING enrichment in gene  
731 ontology enriched and non-enriched clusters.
- 732 (E) Each gene pair is given a similarity score based on how often they were clustered together  
733 across 100 resolutions and these values are compiled into a consensus matrix.  
734 Agglomerative hierarchical clustering is applied to the matrix, with the plateau in the  
735 average silhouette score defining the optimal number of clusters.
- 736 (F) Heatmap of consensus matrix as clustered using agglomerative hierarchical clustering for  
737 173 clusters.
- 738 (G) Histogram of the number of genes in each of the 173 clusters.
- 739 (H) Silhouette scores and correlation scores calculated for each gene to evaluate the clustering  
740 robustness and quality respectively. Data generated for 450 genes selected from 12 random  
741 clusters.

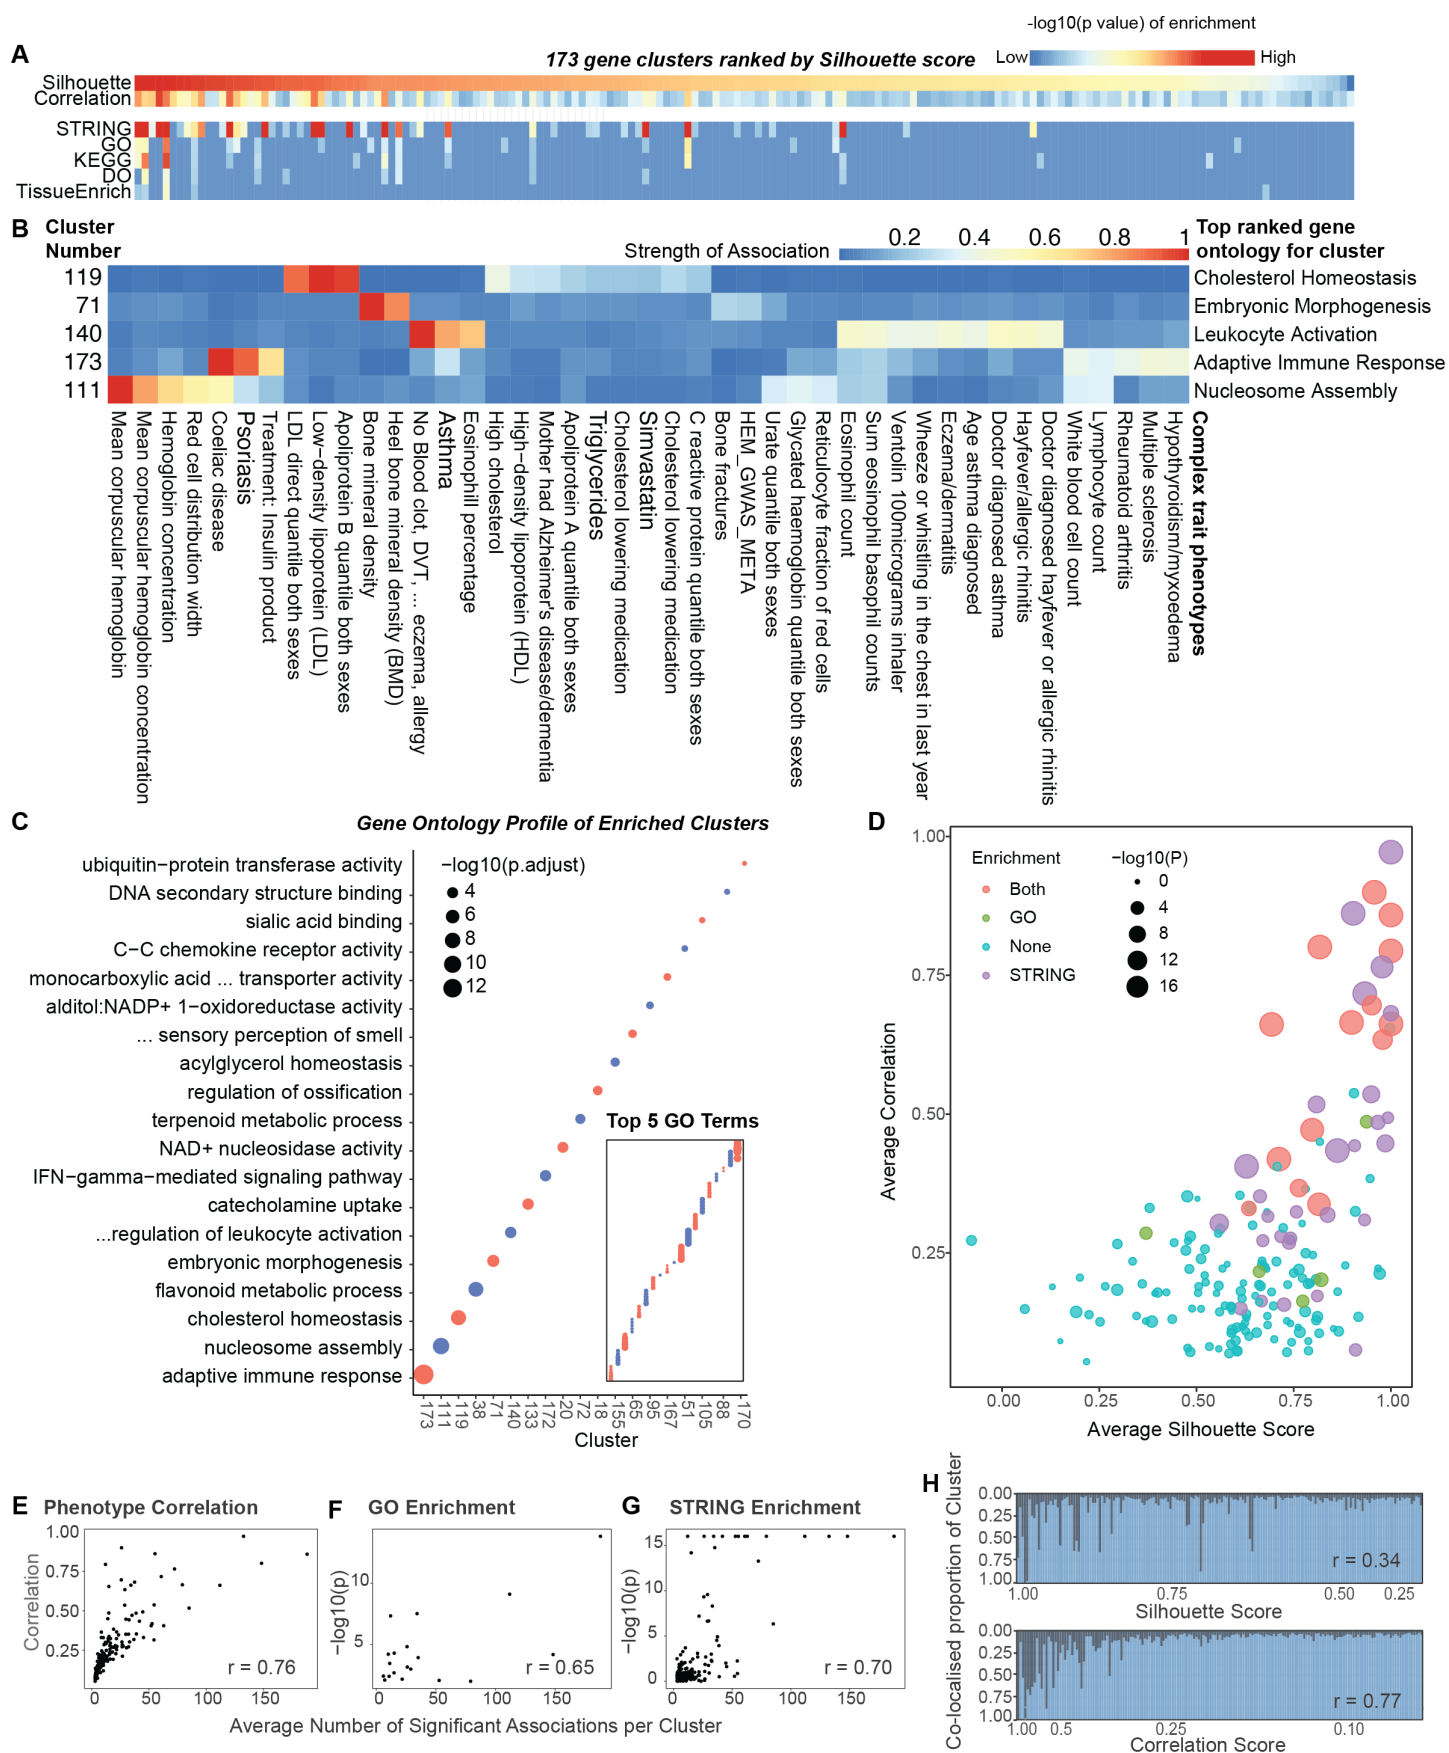

742

743 **Figure 3. Enrichment of identified clusters for known gene sets is dependent on data**  
744 **quality.**

745 **(A)** Broad enrichment profile of 173 clusters stratified by average silhouette and correlation  
746 scores.

747 **(B)** Heatmap showing the relationship between the biological profile of five clusters, as  
748 proxied by their top gene ontology term, and the unique phenotypic signature. The top 10  
749 phenotypes per cluster were selected. Association strength was calculated using negative log  
750 transformed significance values, which were then normalised across phenotypes and then per  
751 cluster. **(C)** Top enriched gene ontology biological processes for each cluster have no overlap.  
752 Clusters ranked by strength of top enriched term. Specificity of top 5 terms per cluster is also  
753 provided. **(D)** 173 clusters stratified by their average correlation and silhouette scores with  
754 their gene ontology and STRING enrichment indicated. The P-value represented is specific to  
755 the enriched category, and in the case of both represents the more significant of the two.

756 **(E-G)** Correlation between the average number of significant gene-trait associations per cluster  
757 and **(E)** the average correlation score of each cluster **(F)**, strength of GO enrichment and strength  
758 of STRING enrichment per cluster (Pearson's correlation) **(G)**.

759 **(H)** Presence and degree of colocalization within clusters as stratified by their silhouette and  
760 correlation scores (Pearson's correlation).

761

762

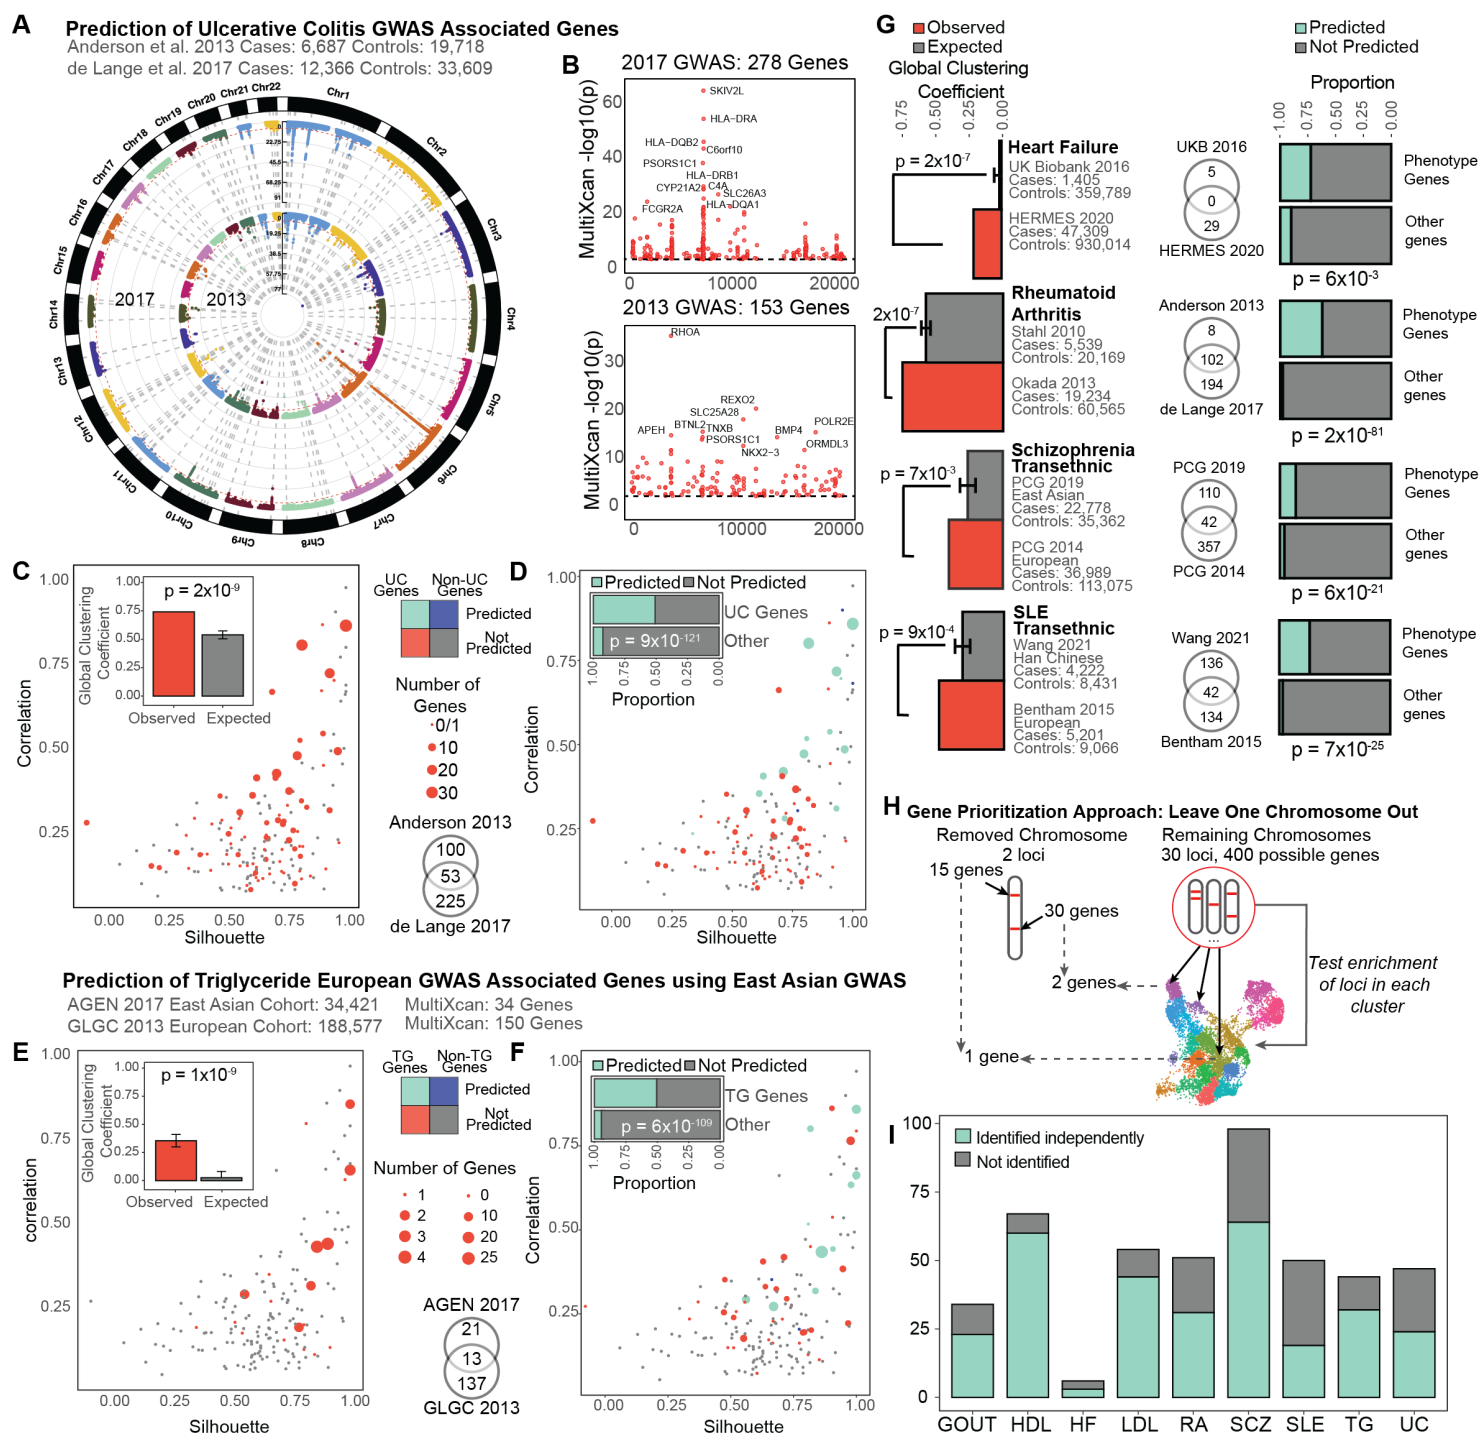

763

764 **Figure 4. Identified clusters are conserved across all phenotypes and can be used for**  
 765 **prediction of genes involved in complex trait biology and prioritization of GWAS genes at**  
 766 **implicated loci.**

767 **(A)** Manhattan plot of loci identified by a 2017 and 2013 GWAS of ulcerative colitis (UC). **(B)**  
 768 Manhattan plot of S-MultiXcan genes for the two GWAS respectively, genes are ordered  
 769 according to their genomic positions.

- 770 **(C)** Distribution of 278 significant genes from the 2017 UC GWAS across 173 clusters.  
771 Global clustering coefficient was calculated for the 278 genes. Significance was calculated  
772 using 100 bootstrap replicates to establish a distribution from which a Z score was calculated.
- 773 **(D)** Prediction of 2017 UC GWAS genes using 2013 UC GWAS. Chi-squared enrichment  
774 test was used to determine enrichment for prediction of novel genes compared to non-trait  
775 associated genes.
- 776 **(E)** Distribution and global clustering coefficient of 34 significant genes from East Asian  
777 GWAS of Triglyceride levels. Significance was calculated using bootstrapping.
- 778 **(F)** Prediction of 137 novel genes from 2013 European GWAS of triglycerides using 2017  
779 East Asian GWAS. Enrichment was calculated using chi-squared test.
- 780 **(G)** Increase in observed global clustering coefficient compared to expected and prediction  
781 enrichment across four additional traits.
- 782 **(H)** Schematic of gene prioritization strategy using the leave one chromosome out approach.  
783 Potential genes at a significant locus were refined using clusters enriched for the trait.
- 784 **(I)** The proportion of loci at which a gene was successfully identified independently of all  
785 genes on the same chromosome.  
786
